# Supplementary material for: Next-Generation Sequencing-Directed Therapy in Patients with Metastatic Breast Cancer in Routine Clinical Practice
Source: MDPI journal article supplement (doi:10.3390/cancers13184564), 2021-09-11
Supplement: s1 [file s1]

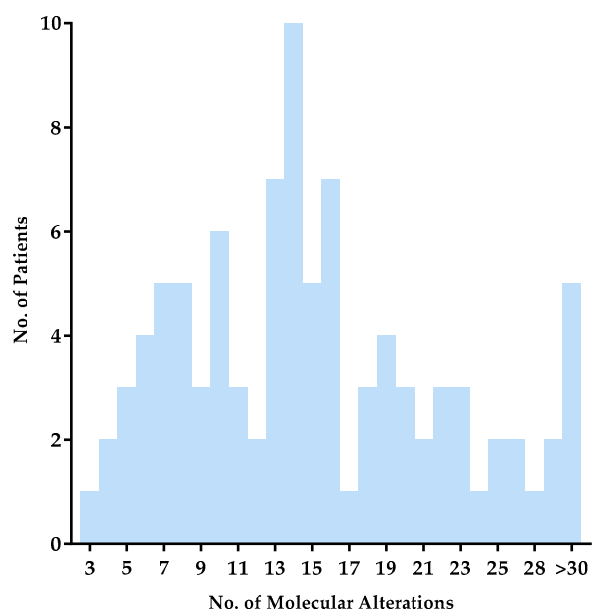

**Figure S1.** Number of genetic aberrations per patient identified by the FoundationOne® (CDx) assay.

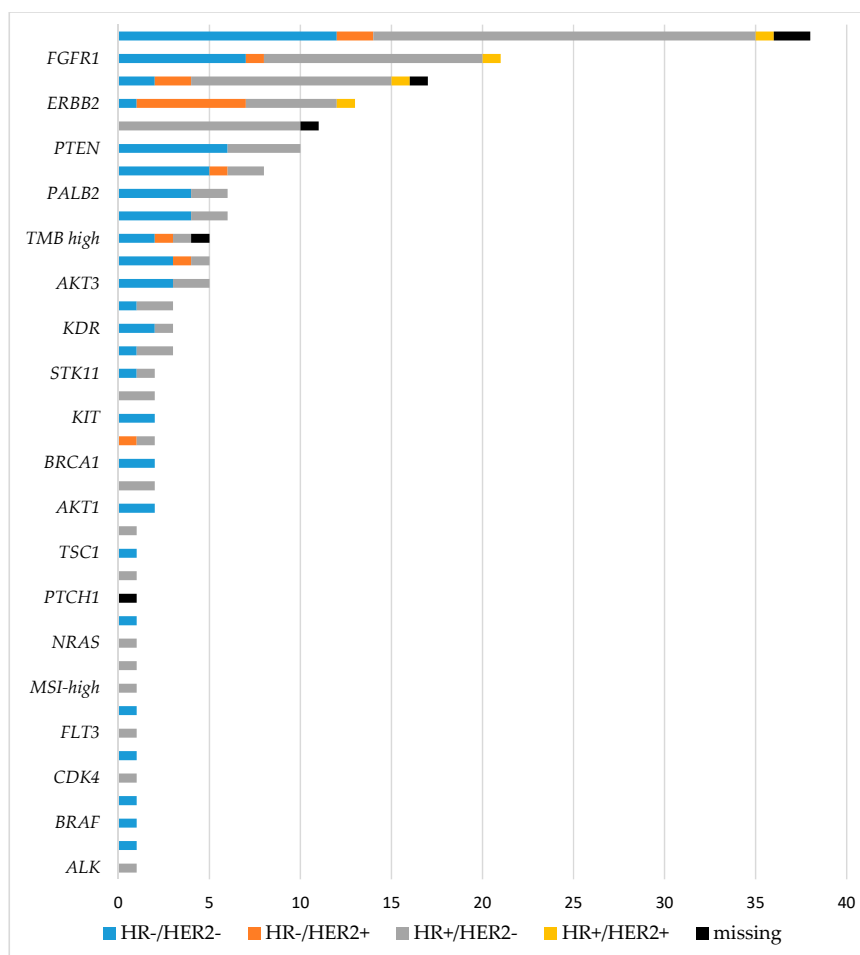

**Figure S2.** Genes with targetable molecular alterations according to tumor receptor subtype in 83 patients with metastatic breast cancer. *PIK3CA*, *FGFR1*, *CCND1*, *ERBB2*, and *ESR1* had >10 targetable alterations, mostly allocated to HR+/*HER2*- subtype except alterations in *ERBB2* which were most often present in patients with HR-/*HER2*+ disease. *HER2*, human epidermal growth factor receptor-2; HR, hormone receptor.

**Table S2.** Actionable alterations and approval (+) of NGS-based therapy by tumor board.

| Genes with Actionable Alterations | NGS-Recommended Therapies |           |     |          |     | TB-Approved Therapies |
|-----------------------------------|---------------------------|-----------|-----|----------|-----|-----------------------|
|                                   | Total                     | Off-Label |     | On-Label |     |                       |
|                                   |                           | Total     | TB+ | Total    | TB+ |                       |
| AKT1                              | 2                         | 0         | 0   | 2        | 2   | 2                     |
| AKT3                              | 5                         | 2         | 2   | 3        | 1   | 3                     |
| ALK                               | 1                         | 1         | 0   | 0        | 0   | 0                     |
| ARAF                              | 1                         | 1         | 0   | 0        | 0   | 0                     |
| ATM                               | 2                         | 2         | 0   | 0        | 0   | 0                     |
| BRAF                              | 1                         | 1         | 1   | 0        | 0   | 1                     |
| BRCA1                             | 2                         | 1         | 1   | 1        | 1   | 2                     |
| BRCA2                             | 6                         | 4         | 0   | 2        | 0   | 0                     |
| CCND1                             | 17                        | 4         | 0   | 13       | 4   | 4                     |
| CD273                             | 1                         | 1         | 0   | 0        | 0   | 0                     |
| CD274                             | 3                         | 1         | 1   | 2        | 2   | 3                     |
| CDK4                              | 1                         | 0         | 0   | 1        | 0   | 0                     |
| EGFR                              | 5                         | 4         | 0   | 1        | 0   | 0                     |
| ERBB2                             | 13                        | 7         | 4   | 6        | 4   | 8                     |
| ESR1                              | 11                        | 0         | 0   | 11       | 5   | 5                     |
| FBXW7                             | 2                         | 1         | 0   | 1        | 1   | 1                     |
| FGFR1                             | 21                        | 21        | 5   | 0        | 0   | 5                     |
| FGFR2                             | 1                         | 1         | 0   | 0        | 0   | 0                     |
| FLT3                              | 1                         | 1         | 0   | 0        | 0   | 0                     |
| FLT4                              | 1                         | 1         | 0   | 0        | 0   | 0                     |
| KDR                               | 3                         | 3         | 0   | 0        | 0   | 0                     |
| KIT                               | 2                         | 2         | 0   | 0        | 0   | 0                     |
| KRAS                              | 2                         | 2         | 0   | 0        | 0   | 0                     |
| MSI-high                          | 1                         | 1         | 1   | 0        | 0   | 1                     |
| MTOR                              | 1                         | 0         | 0   | 1        | 0   | 0                     |
| NF1                               | 8                         | 8         | 0   | 0        | 0   | 0                     |
| NRAS                              | 1                         | 1         | 0   | 0        | 0   | 0                     |
| PALB2                             | 6                         | 6         | 4   | 0        | 0   | 4                     |
| PDCD1LG2                          | 3                         | 1         | 1   | 2        | 2   | 3                     |
| PDGFRA                            | 1                         | 1         | 0   | 0        | 0   | 0                     |
| PIK3CA                            | 38                        | 12        | 8   | 26       | 19  | 27                    |
| PTEN                              | 10                        | 7         | 5   | 3        | 3   | 8                     |
| PTCH1                             | 1                         | 1         | 0   | 0        | 0   | 0                     |
| RAD51c                            | 1                         | 1         | 1   | 0        | 0   | 1                     |
| STK11                             | 2                         | 1         | 0   | 1        | 1   | 1                     |
| TMB high                          | 5                         | 5         | 2   | 0        | 0   | 2                     |
| TSC1                              | 1                         | 1         | 0   | 0        | 0   | 0                     |
| TSC2                              | 1                         | 0         | 0   | 1        | 1   | 1                     |
| Total                             | 184                       | 107       | 36  | 77       | 46  | 82                    |
| Patients <sup>1</sup>             | 83                        | 66        | 32  | 56       | 34  | 63                    |

<sup>1</sup>Some patients had more than one actionable alteration in the same gene or actionable mutations in several genes. MSI, microsatellite instability; NGS, next-generation sequencing; TMB, tumor mutational burden; TB, tumor board.

**Table S3.** Clinical characteristics of 30 patients who received NGS-directed therapy versus 65 patients who did not receive matched therapy.

| Variable                                                                  |                 | No.              | %    | No.              | %    | No.              | %    | P value |
|---------------------------------------------------------------------------|-----------------|------------------|------|------------------|------|------------------|------|---------|
| Patients                                                                  |                 | 95               | 100  | 30               | 100  | 65               | 100  |         |
| Age (years) at diagnosis                                                  | median (range)  | 49 (21–80)       |      | 51 (21–80)       |      | 49 (24–74)       |      | 0.209   |
| Age (years) when NGS was performed                                        | median (range)  | 55 (25–82)       |      | 56 (25–82)       |      | 55 (26–81)       |      | 0.457   |
| Metastatic status at diagnosis                                            | M0              | 80               | 84.2 | 24               | 80.0 | 56               | 86.2 | 0.445   |
|                                                                           | M1              | 15               | 15.8 | 6                | 20.0 | 9                | 13.8 |         |
| Progression-free survival (months) in M0 patients after initial diagnosis | median (95% CI) | 35.3 (28.0–43.0) |      | 36.0 (21.6–50.4) |      | 31.0 (22.0–40.0) |      | 0.302   |
| Tumor receptor subtype at diagnosis                                       | HR+/HER2-       | 54               | 56.8 | 20               | 66.7 | 34               | 52.3 | 0.011   |
|                                                                           | HR-/HER2-       | 27               | 28.4 | 3                | 10.0 | 24               | 36.9 |         |
|                                                                           | HR+/HER2+       | 7                | 7.4  | 4                | 13.6 | 3                | 4.6  |         |
|                                                                           | HR-/HER2+       | 4                | 4.2  | 3                | 10.0 | 1                | 1.5  |         |
|                                                                           | missing         | 3                | 3.2  | 0                | 0    | 3                | 4.6  |         |
| Tumor receptor subtype of recurrent tumor site                            | HR+/HER2-       | 48               | 50.5 | 16               | 53.3 | 32               | 49.2 | 0.098   |
|                                                                           | HR-/HER2-       | 38               | 40.0 | 10               | 33.3 | 28               | 43.1 |         |
|                                                                           | HR+/HER2+       | 2                | 2.1  | 0                | 0    | 2                | 3.1  |         |
|                                                                           | HR-/HER2+       | 5                | 5.3  | 4                | 13.3 | 1                | 1.5  |         |
|                                                                           | missing         | 2                | 2.1  | 0                | 0    | 2                | 3.1  |         |
| Number of prior systemic therapy lines for recurrent disease              | 1               | 27               | 28.4 | 6                | 20.0 | 21               | 32.3 | 0.548   |
|                                                                           | 2               | 25               | 26.3 | 8                | 26.7 | 17               | 26.2 |         |
|                                                                           | 3               | 13               | 13.7 | 6                | 20.0 | 7                | 10.8 |         |
|                                                                           | 4               | 12               | 12.6 | 5                | 16.7 | 7                | 10.8 |         |
|                                                                           | ≥ 5             | 18               | 18.9 | 5                | 16.7 | 13               | 20.0 |         |
| Biopsy site for NGS                                                       | primary tumor   | 35               | 36.8 | 10               | 33.3 | 25               | 38.5 | 0.944   |
|                                                                           | lymph node      | 19               | 20.0 | 6                | 20.0 | 13               | 20.0 |         |
|                                                                           | skin            | 9                | 9.5  | 3                | 10.0 | 6                | 9.2  |         |
|                                                                           | liver           | 17               | 17.9 | 7                | 23.3 | 10               | 15.4 |         |
|                                                                           | lung/pleura     | 5                | 5.3  | 1                | 3.3  | 4                | 6.2  |         |
|                                                                           | others          | 10               | 10.5 | 3                | 10.0 | 7                | 10.8 |         |

CI, confidence interval; HER2, human epidermal growth factor receptor-2; HR, hormone receptor; NGS, next-generation sequencing.
